# Supplementary material for: LncRNA MALAT1 enhances oncogenic activities of EZH2 in castration-resistant prostate cancer
Source: PubMed Central journal article supplement (PMC4747388; doi:10.18632/oncotarget.5728), 2015-10-15
Supplement: oncotarget-06-41045-s001.pdf [file oncotarget-06-41045-s001.pdf]

## SUPPLEMENTARY FIGURE AND TABLE

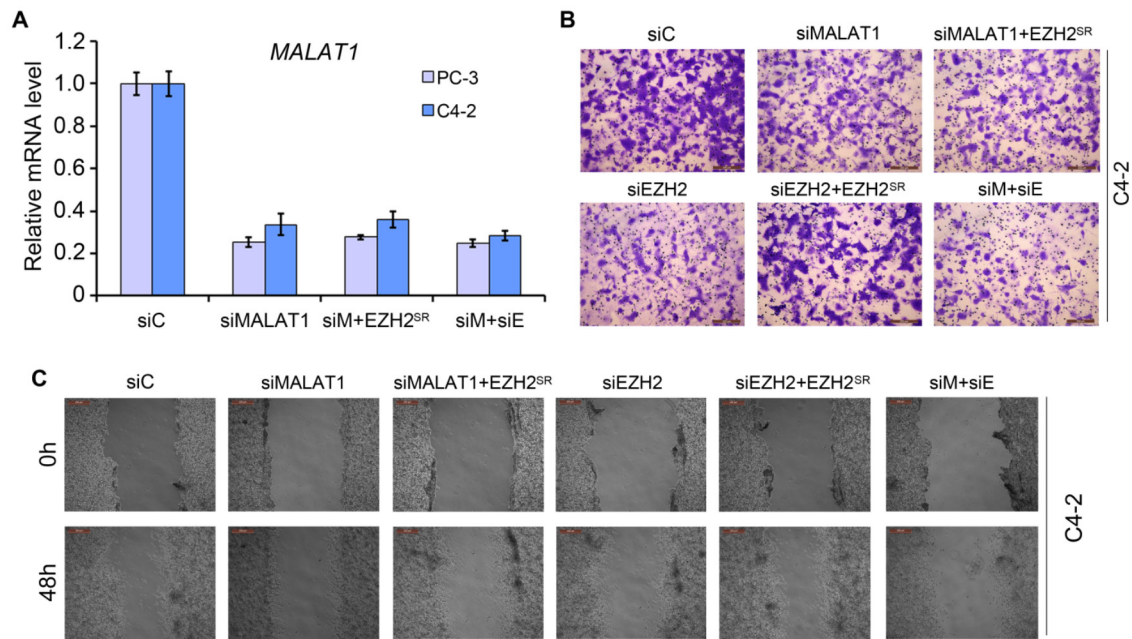

**Supplementary Figure S1: *MALAT1* facilitates *EZH2*-mediated PCa cell migration and invasion.** PC-3 and C4-2 cells were transfected with siRNAs and/or siRNA-resistant *EZH2* expression vector (Myc-*EZH2*<sup>SR</sup>) as indicated in Figure 5A. **A.** At 48 h after transfection, RT-qPCR analysis of *MALAT1* expression in PC-3 and C4-2 cells transfected with control siRNA (siC) and *MALAT1*-specific siRNA (siMALAT1 or siM). Data are means  $\pm$  S.D. from experiments with three replicates. **B.** C4-2 cells were transfected as indicated in Figure 5A. At 48 h after transfection, cells were used for matrigel invasion assays. Representative images of invasion assay are shown. **C.** At 24 h after transfection, artificial wounds were created on C4-2 cells grown in confluence. Images were taken at 0, 48 h after wound. Scale bar, 200  $\mu$ m.

## Supplementary Table S1: Information of the primers, sequences of siRNAs/shRNAs used

## MALAT1 Cloning Primers

|      |                                      |
|------|--------------------------------------|
| M1-F | CCCAAGCTTGGGGTAAAGGACTGGGGCCCCGCAACT |
| M1-R | TATGAAGACTTAGAAGAGTACCGCTCGAGCGG     |
| M2-F | CCCAAGCTTGGGGCATGAGGAAGGAAAAGATA     |
| M2-R | ACCACTCGCTTTCCTGTCCGCTCGAGCGG        |
| M3-F | CCCAAGCTTGGGTGGTAAAAATCCGTGAGGTC     |
| M3-R | CACTACCATATCCAAACAACCCGCTCGAGCGG     |
| M4-F | CCCAAGCTTGGGTGTGGTTCTCTTTTGAATT      |
| M4-R | TGGTCCATTAAAGAGTGTTCCCGCTCGAGCGG     |
| M5-F | CCCAAGCTTGGGGATCAGGATTTGAGCGGAAG     |
| M5-R | TTGTTGTCTCTCCTGCCACACCGCTCGAGCGG     |
| M6-F | CCCAAGCTTGGGAGCGCTATTATCCTAAGGTC     |
| M6-R | TTTAGAGCTTCTCCATTTCCGCTCGAGCGG       |

(Continued)

**MALAT1 Cloning Primers**

| <b>RT-qPCR primers</b>   |                          |
|--------------------------|--------------------------|
| DAB2IP-F                 | ACACGCCATGGAGCCCGACT     |
| DAB2IP-R                 | GAAGCCCGTGACCCGGAACG     |
| BARCHYURY-F              | AGGTGGGGAAGTTTCCTTCT     |
| BARCHYURY-R              | GCAAATGAGGTCCTTTTGGT     |
| M1-RT-F                  | TTGAGGCGTTTTCCAAGAGT     |
| TMEM48-RT-F              | AGGTCGCGGGACATACTGT      |
| TMEM48-RT-R              | TGCAGATGGGTAGAAATAGCACT  |
| CKS2-RT-F                | TTCGACGAACACTACGAGTACC   |
| CKS2-RT-R                | GGACACCAAGTCTCCTCCAC     |
| KIAA0101-RT-F            | ATGGTGCGGACTAAAGCAGAC    |
| KIAA0101-RT-R            | CCTCGATGAAACTGATGTCTGAAT |
| M1-RT-R                  | CGGTTGAGAAGTGGCAAAAT     |
| M2-RT-F                  | GACGGAGGTTGAGATGAAGC     |
| M2-RT-R                  | ATTCGGGGCTCTGTAGTCCT     |
| M3-RT-F                  | CCCACCCCTTAATCAGACT      |
| M3-RT-R                  | CAACAGCACAGCGGTACACT     |
| M4-RT-F                  | GTGTGCCAATGTTTCGTTTG     |
| M4-RT-R                  | AGGAGAAAGTGCCATGGTTG     |
| M5-RT-F                  | AAAGCAAGGTCTCCCCACAAG    |
| M5-RT-R                  | GGTCTGTGCTAGATCAAAGGCA   |
| M6-RT-F                  | CTCCCCACAAGCAACTTCTC     |
| M6-RT-R                  | TTCAACCCACCAAAGACCTC     |
| FOXO1-RT-F               | CGTGCTTACAGCCTTCTA       |
| FOXO1-RT-R               | ACCTCCATCGTGACAAAA       |
| <b>ChIP-qPCR primers</b> |                          |
| DAB2IP-F                 | CCTGCTTTCTGTTTCCTTCTCCTG |
| DAB2IP-R                 | TTGAACCACCTCCTCCTCCCTCTC |
| BARCHYURY-F              | AGGTGGGGAAGTTTCCTTCT     |
| BARCHYURY-R              | GCAAATGAGGTCCTTTTGGT     |
| <b>siRNA sequences</b>   |                          |
| non-specific siRNA/shRNA | UAGCGACUAAACACAUCAA      |
| siEZH2 (SMART pool)      | CAAAGAAUCUAGCAUCAUA      |
|                          | GAGGACGGCUUCCCAAUAA      |
|                          | GCUGAAGCCUCA AUGUUUA     |
|                          | GAAUGGAAACAGCGAAGGA      |
| MALAT1-siRNA (siM1)      | GACCUUGAAAUCCAUGACGUU    |
| MALAT1-siRNA (siM2)      | GAUCCAUAUCGGUUUCAAGGUU   |
